# Supplementary material for: Anti-inflammatory effects of myristic acid mediated by the NF-κB pathway in lipopolysaccharide-induced BV-2 microglial cells
Source: Royal Society of Chemistry journal article supplement (doi:10.1039/d3mo00063j), 2023-07-19
Supplement: d3mo00063j3.xlsx [file d3mo00063j3.xlsx]

## Sheet: PD - NC
id	MS2 name	MS2 ppm	MS2 score	KEGG ID	Monoisotopic Molecular Weight	RT [min]	Formula	Molecular Weight	mz	MEAN PD	MEAN NC	VIP	P-VALUE	Q-VALUE	FOLD CHANGE	LOG_FOLDCHANGE	PD001_N	PD002_N	PD003_N	PD004_N	PD005_N	PD006_N	PD007_N	PD008_N	PD009_N	PD010_N	NC001_N	NC002_N	NC003_N	NC004_N	NC005_N	NC006_N	NC007_N	NC008_N	NC009_N	NC010_N
41	L-Lactic acid	-18.23	99.5	C00186	90.0317	0.999	C3 H6 O3	90.0301	89.0228	0.0221569	0.0194343	1.23512	0.0401085	0.339677	1.14009	0.189151	0.0217529	0.0161519	0.0230328	0.0233208	0.0214951	0.0210825	0.0222899	0.0204785	0.0265298	0.0254351	0.0199017	0.0209007	0.0183057	0.0238401	0.0186132	0.0138581	0.019896	0.0213432	0.0203055	0.017379
101	Gamma-Aminobutyric Acid	-15.44	99.7	C00334	103.063	0.814	C4 H9 N O2	103.062	102.054	0.00115136	0.00134061	2.09131	0.00404503	0.152893	0.858828	-0.219559	0.00125853	0.00122825	0.00101494	0.00102778	0.00117495	0.00121744	0.00132967	0.00103476	0.0011345	0.00109273	0.00128236	0.00138275	0.00119819	0.0012627	0.00129214	0.00167057	0.00134338	0.00114496	0.00141871	0.00141037
115	Serine	-15.35	87.5		105.043	0.795	C3 H7 N O3	105.041	104.034	0.00110602	0.00122189	1.58836	0.0487968	0.358014	0.905169	-0.143741	0.00124536	0.00125839	0.000964747	0.000955704	0.00114679	0.00112047	0.0012392	0.000984392	0.001098	0.00104714	0.00118618	0.00121056	0.0011113	0.00112293	0.00113794	0.00151082	0.00121739	0.00109445	0.00129993	0.00132745
151	MALEIC ACID	-13.43	99.1		116.011	1.406	C4 H4 O4	116.009	115.002	0.00178642	0.00247887	2.41257	0.000474328	0.0582364	0.720661	-0.472607	0.00212647	0.00202814	0.00132312	0.00115573	0.00129544	0.00216387	0.0020278	0.00155465	0.00205267	0.00213636	0.0019083	0.00271529	0.00258254	0.00275563	0.00234242	0.00193272	0.00261726	0.00253473	0.00268698	0.00271282
247	Beta-Leucine	-11.86	95.2	C02486	131.095	1.543	C6 H13 N O2	131.093	130.086	0.00056963	0.000647089	1.81116	0.0377539	0.33369	0.880296	-0.183939	0.000583959	0.000502583	0.000546631	0.000436631	0.000659713	0.000564033	0.000524116	0.000529419	0.000703997	0.000645221	0.000787992	0.000548873	0.000710314	0.000630092	0.000627261	0.000534701	0.00064931	0.000648134	0.000642277	0.000691942
278	Adenine	-11.54	75	C00147	135.054	1.499	C5 H5 N5	135.053	134.046	5.2134e-05	0.000123749	1.72458	0.0292892	0.308459	0.421288	-1.24712	5.53614e-05	5.10756e-05	1.26704e-05	0.000119776	2.41503e-05	3.61559e-05	0.000134792	1.8334e-05	1.34716e-05	5.55522e-05	2.33031e-05	0.000227922	0.000184816	5.99882e-05	5.61879e-05	8.44264e-05	0.000208335	9.01205e-05	0.00025371	4.86797e-05
358	L-Glutamic acid	-10.45	93.1		147.053	0.819	C5 H9 N O4	147.052	146.044	0.0111903	0.0127119	1.68975	0.0420888	0.344337	0.880295	-0.183941	0.0123507	0.00895041	0.0100294	0.0122388	0.0117065	0.0108652	0.0131137	0.0119327	0.00952115	0.0111941	0.0096598	0.013475	0.0109985	0.0135877	0.0107917	0.0147116	0.0142048	0.0122352	0.0145934	0.0128616
570	ASCORBIC ACID	-7.72	85.3		176.032	1.237	C6 H8 O6	176.031	175.023	0.00280973	0.00166565	1.93255	0.0303475	0.311343	1.68687	0.75435	0.00204624	0.00223247	0.00556436	0.00495208	0.00164766	0.0029582	0.00257372	0.00188339	0.00265506	0.00158414	0.00252826	0.00180143	0.00196525	0.000508032	0.00220999	0.00098365	0.00158692	0.00123022	0.00267487	0.00116786
611	Hydroxyphenyllactic acid	-6.73	63.7	C03672	182.058	3.445	C9 H10 O4	182.057	181.049	0.000150128	0.000212093	1.74613	0.0136811	0.242048	0.70784	-0.498505	0.000128711	0.000116051	0.000193395	0.000220391	0.000180452	0.000124942	0.000100655	9.40969e-05	0.00015066	0.000191925	0.00022022	0.000243926	0.000223883	0.00023507	0.000134787	0.000126551	0.000213276	0.000196025	0.000328287	0.000198906
985	Carnosine	-4.31	95.2		226.107	0.737	C9 H14 N4 O3	226.106	225.098	0.000273278	0.00023482	1.4958	0.0472341	0.355086	1.16378	0.218817	0.000255845	0.000188058	0.000226239	0.000302286	0.000275798	0.000320206	0.00025668	0.000325331	0.00029157	0.000290768	0.000284018	0.000232254	0.000236444	0.000265276	0.000268334	0.000177939	0.000229072	0.000267815	0.00021142	0.000175626
1008	Myristic acid	-4.49	98.4	C06424	228.209	12.43	C14 H28 O2	228.208	227.201	1.73123e-05	1.98433e-05	1.74067	0.00847397	0.207723	0.872448	-0.196858	1.6221e-05	1.86767e-05	1.79174e-05	1.65493e-05	1.94422e-05	1.98183e-05	1.70491e-05	1.69318e-05	1.43984e-05	1.61187e-05	1.77851e-05	1.59723e-05	1.98423e-05	1.80015e-05	2.09422e-05	2.28908e-05	1.9653e-05	2.13691e-05	1.97669e-05	2.22102e-05
1356	Heptadecanoic acid	-2.47	76.4		270.256	14.099	C17 H34 O2	270.255	269.248	6.50234e-06	7.43962e-06	1.42749	0.042078	0.344313	0.874015	-0.19427	5.9507e-06	8.28576e-06	5.20254e-06	6.31301e-06	7.80399e-06	6.05021e-06	6.42479e-06	6.07305e-06	6.4937e-06	6.42564e-06	7.51555e-06	6.13915e-06	6.50425e-06	6.39769e-06	7.22292e-06	9.20732e-06	6.89057e-06	8.55421e-06	8.33138e-06	7.63313e-06
1372	16-Hydroxyhexadecanoic acid	-2.37	98.9	C18218	272.235	10.089	C16 H32 O3	272.235	271.227	2.37228e-05	2.9747e-05	1.88854	0.00341861	0.142924	0.797485	-0.326471	2.58525e-05	2.96297e-05	2.26078e-05	1.73874e-05	1.91066e-05	2.67048e-05	2.01415e-05	2.49958e-05	2.38872e-05	2.69147e-05	3.27988e-05	3.64399e-05	2.30455e-05	2.68084e-05	3.00365e-05	3.38571e-05	2.548e-05	2.90535e-05	2.78916e-05	3.20587e-05
1419	alpha-Linolenic acid	-2.85	90		278.225	12.368	C18 H30 O2	278.224	277.217	2.02967e-05	2.35754e-05	1.73641	0.0428598	0.346067	0.860928	-0.216035	1.75553e-05	1.90029e-05	1.84396e-05	1.86156e-05	2.75458e-05	2.40774e-05	1.8054e-05	1.6891e-05	2.21419e-05	2.06434e-05	1.80515e-05	1.96947e-05	2.11996e-05	2.06482e-05	2.51804e-05	2.58652e-05	2.62637e-05	2.58594e-05	2.50474e-05	2.79434e-05
1607	(R)-2-hydroxystearic acid	-2.79	86.3		300.266	11.347	C18 H36 O3	300.266	299.258	7.23286e-06	1.09212e-05	1.82549	0.0289923	0.307622	0.662279	-0.594488	2.92495e-06	6.06602e-06	1.00773e-05	6.17742e-06	9.18667e-06	4.59468e-06	6.38934e-06	1.1284e-05	9.11924e-06	6.50909e-06	1.20559e-05	1.15475e-05	1.20561e-05	6.80491e-06	9.31187e-06	7.77577e-06	2.16314e-05	8.88652e-06	8.72193e-06	1.04199e-05
1811	11,12-Epoxyeicosatrienoic acid	-2.77	86.1	C14770	320.235	10.777	C20 H32 O3	320.234	319.227	7.25954e-05	0.000152378	1.94263	0.00676619	0.189867	0.476416	-1.06971	7.07462e-05	0.000141114	3.70596e-05	5.92336e-05	6.12663e-05	1.48222e-05	6.90152e-05	7.90993e-05	0.000134827	5.87706e-05	0.000193713	6.19883e-05	0.000207673	0.000100869	0.000109616	0.000103795	0.000155672	0.000316463	0.000149862	0.000124129
1935	15-Deoxy-Δ12,14-prostaglandin D2	-1.93	80.7		334.214	7.373	C20 H30 O4	334.214	333.207	2.14472e-05	3.37833e-05	2.56112	0.000193354	0.0337932	0.634846	-0.655523	2.26042e-05	2.15161e-05	2.23829e-05	2.8035e-05	1.72244e-05	1.37223e-05	2.53813e-05	1.5819e-05	2.30208e-05	2.47659e-05	2.51802e-05	3.64288e-05	3.91298e-05	2.74573e-05	2.99398e-05	4.61519e-05	4.22486e-05	2.87707e-05	2.81681e-05	3.43582e-05
1936	Prostaglandin J2	-1.93	83.1		334.214	8.271	C20 H30 O4	334.214	333.207	1.76327e-05	2.6881e-05	2.5903	0.00227711	0.118362	0.655955	-0.608331	1.76005e-05	1.66469e-05	1.96742e-05	1.94723e-05	1.43431e-05	1.47601e-05	1.89932e-05	1.55665e-05	1.92013e-05	2.00691e-05	1.84838e-05	2.79422e-05	3.19317e-05	1.98912e-05	2.31129e-05	4.24628e-05	3.1165e-05	2.39369e-05	2.31987e-05	2.6685e-05
2039	2'-Deoxyguanosine 5'-monophosphate	-3.11	67.7	C00362	347.063	1.251	C10 H14 N5 O7 P	347.062	346.055	0.000193497	0.000155221	1.14763	0.0276849	0.303782	1.24659	0.317984	0.000165199	0.000109552	0.000214266	0.000236213	0.000156347	0.000176399	0.00021606	0.000229854	0.000175334	0.000255745	0.000146755	0.000202237	0.000164345	0.000149274	0.000138056	0.000122454	0.000149349	0.000130891	0.000178503	0.00017035
2079	Prostaglandin D2	-2.24	97.2		352.225	7.373	C20 H32 O5	352.224	351.217	9.53122e-05	0.000156491	2.52619	0.000291484	0.0437146	0.609057	-0.71535	0.000100467	0.000100276	0.000102568	0.000124209	7.09339e-05	6.86932e-05	0.000114018	6.64399e-05	9.56374e-05	0.00010988	0.000119356	0.000179478	0.00017216	0.000118316	0.000137649	0.000240383	0.000185507	0.000127576	0.000135817	0.000148671
2098	6β-Prostaglandin I1	-2.29	94.4		354.241	7.314	C20 H34 O5	354.24	353.233	9.02576e-06	1.2082e-05	2.15773	0.00999217	0.220188	0.74704	-0.420742	1.11132e-05	7.7923e-06	9.18141e-06	9.45164e-06	7.49018e-06	7.31354e-06	9.65988e-06	6.14276e-06	1.00427e-05	1.207e-05	8.69144e-06	1.36428e-05	1.77775e-05	7.54442e-06	1.15554e-05	1.28393e-05	1.36951e-05	1.17788e-05	1.13589e-05	1.19367e-05
2219	Thromboxane B2	-2.33	94.2		370.236	6.696	C20 H34 O6	370.235	369.227	2.58183e-05	3.47078e-05	1.96382	0.0152217	0.24882	0.743877	-0.426865	2.69988e-05	3.0131e-05	2.63136e-05	2.97087e-05	2.14355e-05	2.06606e-05	2.48882e-05	1.70132e-05	2.93405e-05	3.1693e-05	2.54147e-05	3.6506e-05	4.25134e-05	2.17924e-05	2.663e-05	5.1687e-05	4.28398e-05	2.96138e-05	3.19544e-05	3.81266e-05
2220	6-Keto-prostaglandin F1a	-2.32	95		370.236	6.098	C20 H34 O6	370.235	369.227	3.0073e-05	3.66525e-05	1.90465	0.0189716	0.26952	0.820488	-0.285446	3.70251e-05	2.87599e-05	2.89613e-05	3.00335e-05	2.59583e-05	2.42836e-05	2.52285e-05	2.58782e-05	4.03539e-05	3.42474e-05	3.12293e-05	3.59977e-05	4.09656e-05	3.65913e-05	3.14723e-05	4.86197e-05	3.19611e-05	4.38497e-05	3.33158e-05	3.25229e-05
2601	Deoxyguanosine diphosphate	-2.31	79.1	C00361	427.029	0.994	C10 H15 N5 O10 P2	427.028	426.021	0.0004915	0.000580648	2.06972	0.019014	0.269735	0.846468	-0.240473	0.000480982	0.000436976	0.000507607	0.000386494	0.000385418	0.000603313	0.000616016	0.000400182	0.000523559	0.000574451	0.000490118	0.000662011	0.000682741	0.000552225	0.000487624	0.000581584	0.000544548	0.000611338	0.00058338	0.000610913
