# Supplementary material for: Anti-inflammatory effects of myristic acid mediated by the NF-κB pathway in lipopolysaccharide-induced BV-2 microglial cells
Source: Royal Society of Chemistry journal article supplement (doi:10.1039/d3mo00063j), 2023-07-19
Supplement: d3mo00063j8.xlsx [file d3mo00063j8.xlsx]

## Sheet: PD - NC
id	MS2 name	MS2 ppm	MS2 score	KEGG ID	Monoisotopic Molecular Weight	RT [min]	Formula	Molecular Weight	mz	MEAN PD	MEAN NC	VIP	P-VALUE	Q-VALUE	FOLD CHANGE	LOG_FOLDCHANGE	PD001	PD002	PD003	PD004	PD005	PD006	PD007	PD008	PD009	PD010	NC001	NC002	NC003	NC004	NC005	NC006	NC007	NC008	NC009	NC010
443	Choline	2.17	98.1	C00114	103.1	0.809	C5 H13 N O	103.1	104.107	0.0334852	0.0378273	2.14293	0.00115064	0.0364903	0.885213	-0.175904	0.0287266	0.0303591	0.0321773	0.0334152	0.0364852	0.0306784	0.0372316	0.0350939	0.0374562	0.0332287	0.0397446	0.0374729	0.0403068	0.0400722	0.0373275	0.0361869	0.035175	0.0362096	0.0390944	0.0366834
712	Betaine	0.67	98.5	C00719	117.079	0.849	C5 H11 N O2	117.079	118.086	0.00123153	0.00111218	1.55322	0.0238938	0.190453	1.10731	0.147054	0.00124906	0.00105523	0.00125519	0.00129191	0.00118685	0.00138325	0.0011586	0.00127114	0.00137576	0.00108828	0.00115774	0.00107945	0.00114611	0.00112303	0.00126665	0.00086317	0.00109911	0.00120832	0.00111216	0.00106609
780	Nicotinamide	0.2	99.6	C00153	122.048	0.986	C6 H6 N2 O	122.048	123.055	0.00530203	0.00463917	2.03579	0.00317246	0.0645181	1.14288	0.192679	0.00544386	0.00461344	0.00542075	0.00501757	0.0057677	0.00515766	0.00644998	0.00531308	0.00500774	0.00482857	0.00513989	0.00509318	0.00503026	0.00446205	0.00463641	0.00427874	0.0045025	0.00453231	0.00437634	0.00434003
2085	Acetyl-L-carnitine	-1.14	99.4		203.116	1.269	C9 H17 N O4	203.116	204.123	0.000493339	0.000371242	1.19763	0.0473057	0.258253	1.32889	0.410219	0.000606201	0.000317958	0.000776765	0.000660877	0.000369607	0.000396071	0.000525836	0.000522645	0.000487683	0.000269745	0.000390573	0.000408719	0.000358088	0.000521924	0.000244646	0.000255302	0.000356516	0.00042248	0.00044895	0.000305223
2782	Sphingosine	-1.66	97.8		299.282	8.906	C18 H37 N O2	299.282	300.289	0.000201788	0.000278952	2.1153	0.000906704	0.0319517	0.723379	-0.467175	0.00018978	0.00021893	0.000157128	0.000208533	0.000204191	0.000209072	0.000281762	0.000184992	0.000188062	0.00017543	0.000394262	0.00030949	0.000279067	0.000246789	0.00021807	0.000281992	0.000248679	0.000282804	0.000306792	0.000221572
3134	2-Arachidonylglycerol	-1.61	79.5	C13856	378.277	12.236	C23 H38 O4	378.276	379.284	1.15792e-05	6.51498e-06	1.49838	0.0439833	0.25044	1.77732	0.8297	4.83005e-06	5.20415e-06	1.46857e-05	9.70699e-06	2.75957e-05	1.02199e-05	7.21498e-06	1.62199e-05	1.08667e-05	9.24773e-06	5.34122e-06	6.83508e-06	3.85485e-06	1.05794e-05	6.35436e-06	3.30394e-06	6.86782e-06	7.78018e-06	6.32177e-06	7.91119e-06
