# Supplementary figures and images for: Anti-inflammatory effects of myristic acid mediated by the NF-κB pathway in lipopolysaccharide-induced BV-2 microglial cells
Source: Royal Society of Chemistry journal article supplement (doi:10.1039/d3mo00063j), 2023-07-19

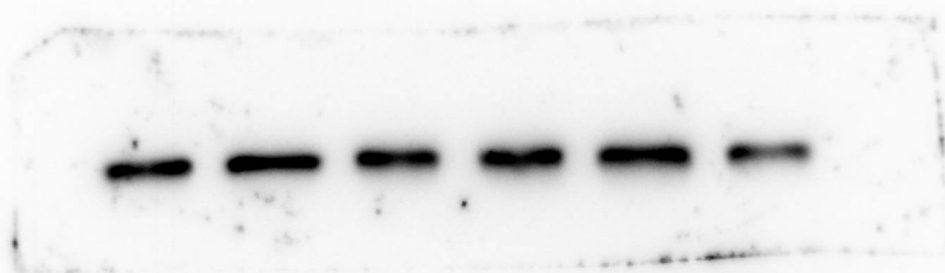

Supplement: d3mo00063j1.pdf [file d3mo00063j1.pdf]

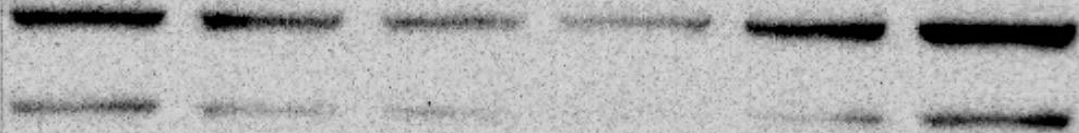

Supplement: d3mo00063j2.pdf [file d3mo00063j2.pdf]

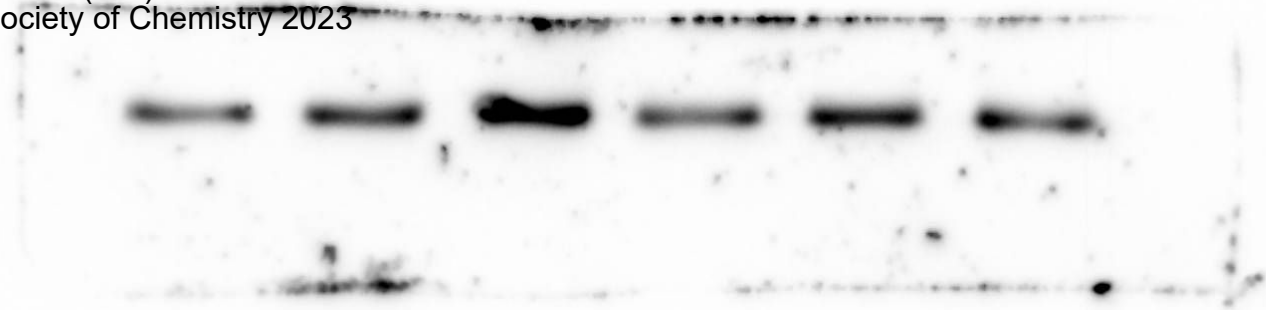

Supplement: d3mo00063j4.pdf [file d3mo00063j4.pdf]

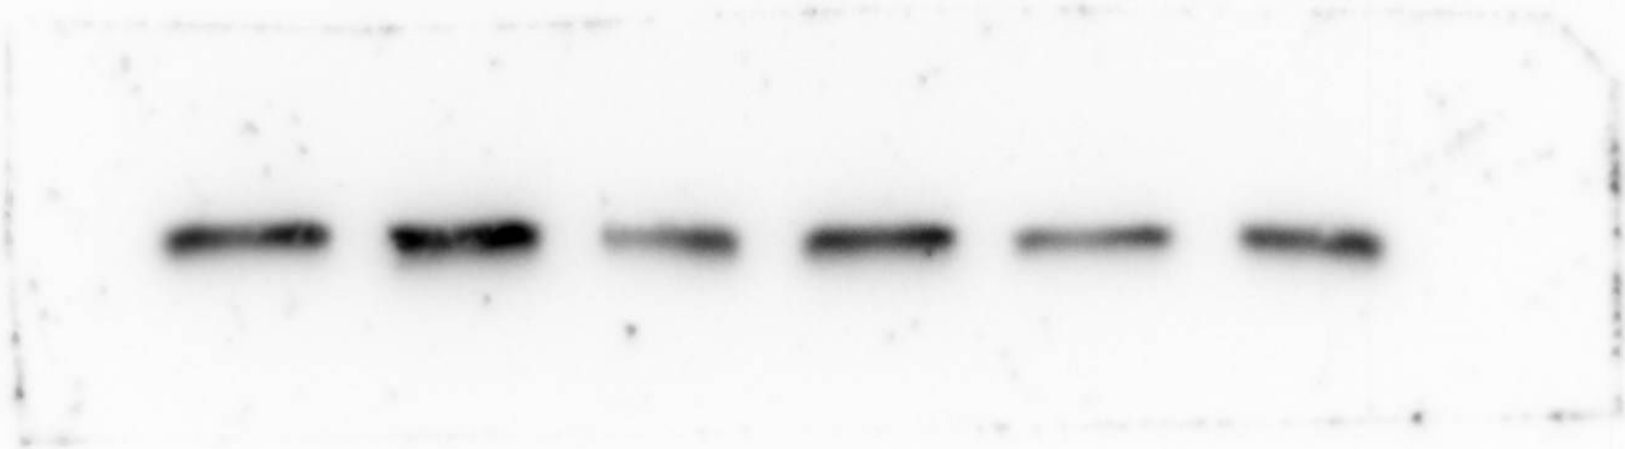

Supplement: d3mo00063j5.pdf [file d3mo00063j5.pdf]

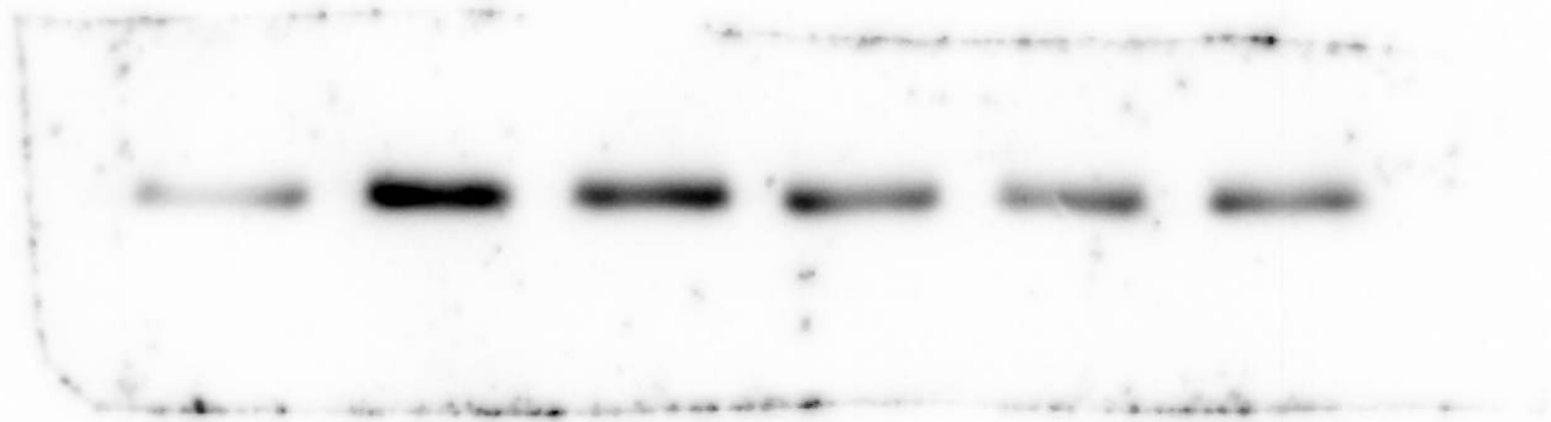

Supplement: d3mo00063j6.pdf [file d3mo00063j6.pdf]

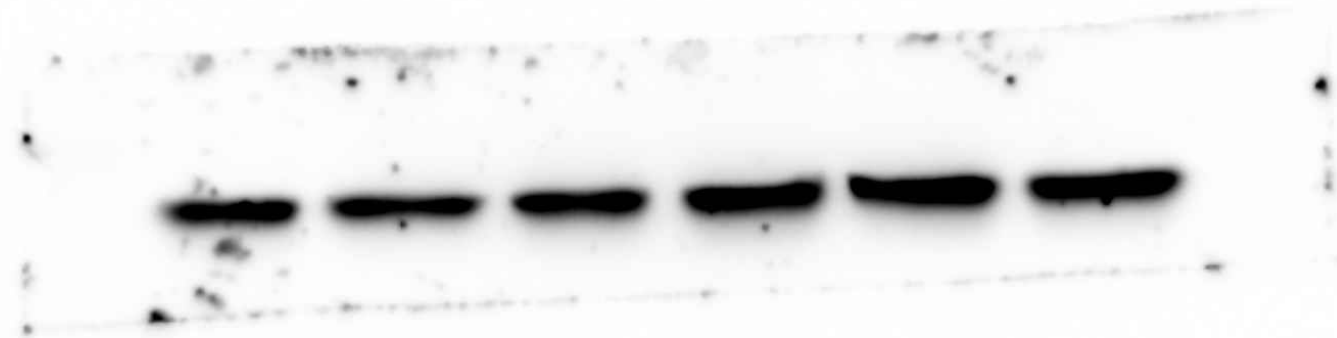

Supplement: d3mo00063j7.pdf [file d3mo00063j7.pdf]
